# Supplementary material
Source: Elsevier journal article supplement (https://www.sciencedirect.com/science/article/pii/S0212656721000809)
Supplement: mmc1 [file S0212656721000809:mmc1.doc]

**ANEXO 1: ENCUESTA PEDIATRAS DE ATENCIÓN PRIMARIA**

**CUESTIONARIO DE EVALUACIÓN DEL PROYECTO DE INTERVENCIÓN EN LA ATENCIÓN DEL PACIENTE PEDIÁTRICO CRÓNICO COMPLEJO**

**El propósito de esta encuesta es analizar las dificultades que tienen los pediatras de Atención Primaria en la asistencia a los niños con necesidades especiales de salud (o paciente pediátrico crónico complejo- PPCC-) que definimos como aquel que presenta:**

1. **Dos o más condiciones patológicas crónicas, con afectación de dos o más órganos o sistemas, con una duración prevista prolongada (superior a 12 meses).**
2. **Una enfermedad progresiva, debilitante, con disminución de la esperanza de vida del paciente.**
3. **Una condición crónica con dependencia de tecnología por un período superior a 6 meses.**

Los autores de la presente encuesta esperamos que los resultados obtenidos puedan ayudar a identificar los problemas y dificultades que los pediatras de Atención Primaria tienen en el manejo de estos pacientes. De esta manera podremos mejorar su asistencia médica que debería ser accesible, continua, integral, centrada en la familia y en el paciente, coordinada, humanitaria y culturalmente aceptada.

| **DATOS PERSONALES DEL PEDIATRA DE ATENCIÓN PRIMARIA** | | | | | | | | | | | |
| --- | --- | --- | --- | --- | --- | --- | --- | --- | --- | --- | --- |
|  |  | |  |  |  | | |  |  | | |
| 1.- | SEXO: | | HOMBRE |  | MUJER | | |  |  | | |
|  |  | |  |  |  | | |  |  | | |
| 2.- | AÑO DE NACIMIENTO | | | |  | | | |  | | |
|  |  | | | |  | | | |  | | |
| 3.- | TÍTULACIÓN POSTGRADUADA | | | | | | | |  | | |
|  |  | | | | | | | |  | | |
|  |  | ESPECIALISTA EN PEDIATRÍA | | | | | | | | |  | |
|  |  |  | | | | | | | | |  | |
|  |  | ESPECIALISTA EN MEDICINA DE FAMILIA | | | | | | | | |  | |
|  |  |  | | | | | | | | |  | |
|  |  | MÉDICO GENERAL | | | | | | | | |  | |
|  |  |  | | | | | | | | |  | |
|  |  | OTRA TITULACIÓN, INDICAR | | | |  | | | | | | |
|  |  |  | | | | | | | | |  | |
| 4.- | SITUACIÓN LABORAL | | | | | | | | | |  | |
|  |  | | | | | | | | | |  | |
|  |  | PLAZA EN PROPIEDAD | | | | | | | | |  | |
|  |  |  | | | | | | | | |  | |
|  |  | INTERINO | | | | | | | | |  | |
|  |  |  | | | | | | | | |  | |
|  |  | SUPLENCIA | | | | | | | | |  | |
|  |  |  | | | | | | | | |  | |
| 5.- | AÑOS DE EJERCICIO PROFESIONAL | | | | | |  | | |

**MANEJO EN ATENCIÓN PRIMARIA DE LOS PACIENTES PEDIÁTRICOS CRÓNICOS COMPLEJOS**

6.- En relación con su práctica habitual con los pacientes pediátricos crónicos complejos considere cómo se encuentra preparado ante los siguientes ítems; valore de 0 a 5 (0 nada capacitado; 5 completamente capacitado).

|  | 6.1.- | Experiencia personal en elaboración de informes médicos para este tipo de pacientes. |
| --- | --- | --- |
|  |  |  |
|  | 6.2.- | Experiencia personal en elaboración de planes específicos de cuidados. |
|  |  |  |
|  | 6.3.- | Prescripción de tratamientos como fisioterapia, terapia ocupacional, rehabilitación logofoniátrica. |
|  |
|  |  |  |
|  | 6.4.- | Coordinación con Atención Temprana (menores 6 años) y centros escolares especializados (mayores 6 años) |
|  |
|  |  |  |
|  | 6.5.- | Rapidez y eficacia en la coordinación con especialidades hospitalarias. |
|  |  |  |
|  | 6.6.- | Prescripción de equipamiento ortopédico (sillas de ruedas, ortesis, audífonos, etc.) |
|  |  |  |
|  | 6.7.- | Cálculo de las necesidades nutricionales. |
|  |  |  |
|  | 6.8.- | Aplicación de test (*screening*) de desarrollo psicomotor. |
|  |  |  |
|  | 6.9.- | Información de recursos comunitarios, coordinación con servicios sociales. |
|  |  |  |

| 7.- A continuación le presentamos varias categorías de afectaciones crónicas complejas de salud. Valore de 0 a 5 cómo se siente generalmente al atender a estos pacientes (0 nada capacitado; 1 muy poco capacitado; 2 poco capacitado; 3 algo capacitado; 4 muy capacitado; 5 completamente capacitado): | | |
| --- | --- | --- |
|  | 7.1.- | Neuromuscular: parálisis cerebral, epilepsia, malformaciones SNC, enfermedades neurodegenerativas, etc. |
|  |
|  |  |  |
|  | 7.2.- | Cardiovascular: cardiopatías congénitas severas, arritmias, etc. |
|  |  |  |
|  | 7.3.- | Respiratoria: malformación vía aérea, fibrosis quística, daño pulmonar crónico, neumopatía intersticial, etc. |
|  |
|  |  |  |
|  | 7.4.- | Gastrointestinal: malformaciones digestivas, síndrome intestino corto, pseudoobstrucción intestinal, daño hepático crónico, etc. |
|  |
|  |  |  |
|  | 7.5.- | Metabólico-endocrinológico: errores congénitos del metabolismo de hidratos de carbono, lípidos o proteínas, enfermedad mitocondrial, diabetes tipo 1, insuficiencia suprarrenal, patología hipofisaria, etc. |
|  |
|  |
|  |  |  |
|  | 7.6.- | Trastornos genéticos/congénitos: cromosomopatías, cuadros polimalformativos, etc. |

|  | 7.7.- | Renal: insuficiencia renal crónicas, malformaciones, etc. |
| --- | --- | --- |
|  |  |  |
|  | 7.8.- | Hematológica-Inmunodeficiencias: anemias hereditarias, inmunodeficiencias, etc. |
|  |  |  |
|  | 7.9.- | Patología derivada de la prematuridad o otros problemas del período neonatal: displasia broncopulmonar, encefalopatía hipóxico-isquémica, etc. |
|  |
|  |  |  |
|  | 7.10.- | Malignidad. |
|  |  |  |
|  | 7.11.- | Trasplante de cualquier tipo. |
| |  |  |  | | --- | --- | --- |   8.- A continuación le presentamos varias técnicas médicas aplicadas habitualmente a estos pacientes. Valore de 0 a 5 cómo se siente generalmente al emplearlas (0 nada capacitado; 1 muy poco capacitado; 2 poco capacitado; 3 algo capacitado; 4 muy capacitado; 5 completamente capacitado): | | |
|  | 8.1.- | Monitor de apnea y/o pulsioximetría. |
|  |  |  |
|  | 8.2.- | Oxigenoterapia domiciliaria. |

|  | 8.3.- | Aspiración mecánica. |
| --- | --- | --- |
|  |  |  |
|  | 8.4.- | Traqueostomía, ventilación mecánica invasiva. |
|  |  |  |
|  | 8.5.- | CPAP, BiPAP, ventilación mecánica no invasiva. |
|  |  |  |
|  | 8.6.- | Derivación ventriculoperitoneal. |
|  |  |  |
|  | 8.7.- | Bomba de baclofeno |
|  |  |  |
|  | 8.8.- | Estimulación vagal o estimulación cerebral profunda. |
|  |  |  |
|  | 8.9.- | Marcapasos o desfibrilador. |
|  |  |  |
|  | 8.10.- | Sondas nasogástricas, nasoyeyunales, gastrostomías, yeyunostomías y colostomías. |
|  |  |  |
|  | 8.11.- | Bomba de nutrición enteral. |
|  |  |  |
|  | 8.12.- | Catéter urinario. |

|  | 8.13.- | Vía venosa central. |
| --- | --- | --- |
|  |  |  |
|  | 8.14.- | Bomba de insulina |
|  |  |  |
|  | 8.15.- | Diálisis peritoneal, hemodiálisis. |
|  |  |  |
|  |  |  |

9.- ¿Le gustaría poder atender a un mayor número de pacientes pediátricos crónicos complejos de los que actualmente atiende?

|  | Sí. |
| --- | --- |
|  |  |
|  | Sí, con ayuda y formación adicional. |

|  | No. | |
| --- | --- | --- |
|  |  |  | |

10.- Los siguientes apartados son posibles problemas en la atención de los pacientes pediátricos crónicos complejos. Valore su importancia del 0 al 5 (0 = totalmente en desacuerdo;1 muy en desacuerdo;2 poco en desacuerdo,3 algo de acuerdo, 4 muy de acuerdo; 5 = totalmente de acuerdo):

|  | 10.1.- | Tiempo de consulta insuficiente. |
| --- | --- | --- |
|  |  |  |
|  | 10.2.- | Falta de formación sobre las condiciones médicas. |

|  | 10.3.- | Falta de entrenamiento en las técnicas médicas usadas. |
| --- | --- | --- |
|  |  |  |
|  | 10.4.- | Falta de experiencia en el manejo de estos pacientes. |
|  |  |  |
|  | 10.5.- | Falta de interés. |
|  |  |  |
|  | 10.6.- | Coordinación inadecuada entre los profesionales que atienden a estos niños. |
|  |  |  |
|  | 10.7.- | Sistemas de información y registro inadecuados. |
|  |  |  |
|  | 10.8.- | Escasez de personal y recursos administrativos. |

|  | 10.9.- | Problemas médico-legales. |
| --- | --- | --- |
|  |  |  |
|  | 10.10.- | Poco desarrollo de planes sanitarios de pacientes crónicos. |

11.- Sugerencias para la mejora de la asistencia a los pacientes crónicos complejos:

|  |
| --- |
|  |
|  |
|  |
|  |
|  |
|  |

Gracias por su participación. Pondremos a su disposición los resultados del presente estudio.
