# Supplementary material
Source: Elsevier journal article supplement (https://www.sciencedirect.com/science/article/pii/S0212656721000809)
Supplement: mmc2 [file S0212656721000809:mmc2.doc]

**ANEXO 2: ENCUESTA A PACIENTES Y/O FAMILIARES**

**CUESTIONARIO DE EVALUACIÓN DEL PROYECTO DE INTERVENCIÓN EN LA ATENCIÓN DEL PACIENTE PEDIÁTRICO CRÓNICO COMPLEJO**

**El propósito de esta encuesta es analizar las dificultades que tienen los pacientes con patología crónica compleja (NPCC) que definimos como aquellos que presentan:**

1. **Dos o más condiciones patológicas crónicas, con afectación de dos o más órganos o sistemas, con una duración prevista prolongada (superior a 12 meses).**
2. **Una enfermedad progresiva, debilitante, con disminución de la esperanza de vida del paciente.**
3. **Una condición crónica con dependencia de tecnología por un período superior a 6 meses.**

Los autores de la presente encuesta esperamos que los resultados obtenidos puedan ayudar a identificar los problemas y dificultades que tienen los familiares y pacientes cuando reciben atención sanitaria. De esta manera podremos mejorar su asistencia médica que debería ser accesible, continua, integral, centrada en la familia y en el paciente, coordinada, humanitaria y culturalmente aceptada.

| **DATOS PERSONALES DEL FAMILIAR QUE RELLENA LA ENCUESTA** | | | | | | | | | |
| --- | --- | --- | --- | --- | --- | --- | --- | --- | --- |
|  |  | |  |  |  | |  |  | |
| 1.- | SEXO: | | HOMBRE |  | MUJER | |  |  | |
|  |  | |  |  |  | |  |  | |
| 2.- | AÑO DE NACIMIENTO | | | |  | | |  | |
|  |  | | | |  | | |  | |
| 3.- | NIVEL ESTUDIOS | | | | | | |  | |
|  |  | | | | | | |  | |
|  |  | PRIMARIA | | | | | | |  | |
|  |  |  | | | | | | |  | |
|  |  | SECUNDARIA | | | | | | |  | |
|  |  |  | | | | | | |  | |
|  |  | UNIVERSITARIO | | | | | | |  | |
|  |  |  | | | | | | |  | |
|  |  | SIN ESTUDIOS | | | |  | | | | |
|  |  |  | | | | | | |  | |
| 4.- | SITUACIÓN FAMILIAR | | | | | | | |  | |
|  |  | | | | | | | |  | |
|  |  | NÚMERO DE NIÑOS MENORES 14 AÑOS EN EL HOGAR | | | | | | | | |
|  |  |  | | | | | | |  | |
|  |  | NÚMERO DE NIÑOS CON CONDICIONES CRÓNICAS O EMPLEO DE DISPOSITIVOS MEDICOS EN EL HOGAR | | | | | | | | | | | |
|  |  |  | | | | | | | | | | | |
|  |  | NÚMERO DE PERSONAS DE LA UNIDAD FAMILIAR EN SITUACIÓN DE DESEMPLEO | | | | | | | | | | | |
|  |  |  | | | | | | | | | | | |
|  |  | ¿HAY ALGUNA PERSONA SIN ACTIVIDAD LABORAL POR CAUSA DEL CUIDADO DEL MENOR? | | | | | | | | | | | |
|  |  |  | | | | | | |  | |
|  |  | NIVEL ECONOMICO FAMILIAR. Indique a, b, c si los ingresos brutos familiares anuales son: | | | | | | | | | | |
|  |  | a.- menos de 30.000 euros/año | | | | | | |  | |
|  |  | b.- entre 30.000 y 60.000 euros/año | | | | | | |  | |
|  |  | c.- más de 60.000 euros/año | | | | | | |  | |
|  |  |  | | | | | | |  | |
| 5.- | ¿HAY UN MIEMBRO DE LA FAMILIA QUE ASUMA ESPECIALMENTE LA COORDINACIÓN Y COMUNICACIÓN CON LOS SERVICIOS SANITARIOS SOCIALES? | | | | | | | | | | |
|  |  |  | | | | | | |  | |
|  |  | SI | | | | | | |  | |
|  |  |  | | | | | | |  | |
|  |  | NO | | | | | | |  | |
|  |  |  | | | | | | |  | |
| 6.- | ¿PERCIBE ALGUNA AYUDA O SUBVENCIÓN POR LA ENFERMEDAD? | | | | | | | | | | |
|  |  |  | | | | | | |  | |
|  |  | SI | | | | | | |  | |
|  |  |  | | | | | | |  | |
|  |  | NO | | | | | | |  | |
|  |  |  | | | | | | |  | |
| 7.- | CUÁNDO SU HIJO TIENE UN PROBLEMA MÉDICO COMÚN (POR EJEMPLO, RESFRIADOS, DIARREA, FIEBRE, etc.) ¿DÓNDE ACUDE NORMALMENTE? | | | | | | | | | | |
|  |  |  | | | | | | |  | |
|  |  | CENTRO DE SALUD | | | | | | |  | |
|  |  |  | | | | | | |  | |
|  |  | HOSPITAL | | | | | | |  | |
|  |  |  | | | | | | |  | |
| 8.- | ¿HA RECIBIDO ATENCIÓN EN SU DOMICILIO EN EL ÚLTIMO AÑO? | | | | | | | | | | |
|  |  |  | | | | | | |  | |
|  |  | SI | | | | | | |  | |
|  |  |  | | | | | | |  | |
|  |  | NO | | | | | | |  | |
|  |  |  | | | | | | |  | |

**MANEJO EN ATENCIÓN PRIMARIA DE LOS PACIENTES PEDIÁTRICOS CRÓNICOS COMPLEJOS**

| 9.- | ¿HA ACUDIDO AL CENTRO DE SALUD EN EL ÚLTIMO AÑO PARA SER ATENDIDO POR SU PEDIATRA? | | | | | | | |
| --- | --- | --- | --- | --- | --- | --- | --- | --- |
|  |  |  | |  | |  | |
|  |  | 9.1.- | SÍ. | |  | |
|  |  |  |  | |  | |
|  |  | 9.2.- | No. | |  | |

| 10.- | CUANDO ACUDE A SU CENTRO DE SALUD PUNTÚE DE 0 A 5 SEGÚN SU EXPERIENCIA (0 COMPLETAMENTE NEGATIVA; 1 MUY NEGATIVA; POCO NEGATIVA; ALGO POSITIVA; MUY POSITIVA; 5 COMPLETAMENTE POSITIVA): |
| --- | --- |

|  | | 10.1.- | Facilidad en obtener citas. | | |
| --- | --- | --- | --- | --- | --- |
|  | |  |  | | |
|  | | 10.2.- | Facilidad en el acceso al centro de salud y consultas. | | |
|  | |  |  | | |
|  | | 10.3.- | Tiempo en la sala de espera. | | |
|  | |  |  | | |
|  | | 10.4.- | El pediatra y la enfermera conocen al niño y sus problemas de salud. | | |
|  | |  |  | | |
|  | | 10.5.- | El pediatra y la enfermera son amables, eficaces y explican bien. | | |
|  | |  |  | | |
|  | | 10.6.- | El resto del personal del centro de salud es amable, útil y contesta las preguntas. | | |
|  | |  |  | | |
|  | | 10.7.- | En el centro de salud resuelven la mayoría de los problemas de salud. | | |
|  | |  |  | | |
|  | | 10.8.- | Tienen en cuenta mis opiniones y creencias. | | |
|  | |  |  | | |
|  | | 10.9.- | Me informan de recursos comunitarios y servicios sociales. | | |
|  | |  |  | | |
|  | | 10.10.- | Me resuelven los problemas técnicos de los dispositivos médicos que el menor necesita | | |
|  | |  | |  |
| **PROBLEMAS EN LA ATENCIÓN PRIMARIA DE LOS PACIENTES PEDIÁTRICOS CRÓNICOS COMPLEJOS** | | | | | |
| 11.- | | LOS SIGUIENTES APARTADOS SON POSIBLES PROBLEMAS EN LA ATENCIÓN PRIMARIA DE LOS PACIENTES PEDIÁTRICOS CRÓNICOS COMPLEJOS. VALORE SU IMPORTANCIA DEL 0 AL 5 (0 TOTALMENTE EN DESACUERDO;1 MUY EN DESACUERDO;2 POCO EN DESACUERDO,3 ALGO DE ACUERDO, 4 MUY DE ACUERDO; 5 TOTALMENTE DE ACUERDO): | | | |

|  |  |  |  |
| --- | --- | --- | --- |
|  |  | 11.1.- | Tiempo de consulta insuficiente. |
|  |  |  |  |
|  |  | 11.2.- | Falta de formación sobre las condiciones médicas. |
|  |  |  |  |
|  |  | 11.3.- | Falta de entrenamiento en las técnicas médicas usadas. |
|  |  |  |  |
|  |  | 11.4.- | Falta de experiencia en el manejo de estos pacientes. |
|  |  |  |  |
|  |  | 11.5.- | Falta de interés. |
|  |  |  |  |
|  |  | 11.6.- | Coordinación inadecuada entre los profesionales que atienden a estos niños. |
|  |  |  |  |
|  |  | 11.7.- | Sistemas de información y registro inadecuados. |
|  |  |  |  |
|  |  | 11.8.- | Escasez de personal y recursos administrativos. |
|  |  |  |  |
|  |  | 11.9.- | Problemas médico-legales. |
|  |  |  |  |
|  |  | 11.10.- | Poco desarrollo de planes sanitarios de pacientes crónicos. |

12.- SUGERENCIAS PARA LA MEJORA DE LA ASISTENCIA A LOS PACIENTES CRÓNICOS COMPLEJOS:

|  |
| --- |
|  |
|  |
|  |
|  |
|  |
|  |
|  |
|  |
|  |
|  |

Gracias por su participación. Pondremos a su disposición los resultados del presente estudio.
